# Supplementary material for: SwedeAmp—the Swedish Amputation and Prosthetics Registry: 8-year data on 5762 patients with lower limb amputation show sex differences in amputation level and in patient-reported outcome
Source: PubMed Central journal article supplement (PMC8023884; doi:10.1080/17453674.2020.1756101), 2020-04-22
Supplement: IORT_A_1756101_SM7012.pdf [file IORT_A_1756101_SM7012.pdf]

## Supplementary data

Table 1. SwedeAmp forms

| Forms                                       | Example of information included                                                                                                                                                                                                                                                                                                                                                                                                                                                                                                                                                                                                                                                                                                                     |
|---------------------------------------------|-----------------------------------------------------------------------------------------------------------------------------------------------------------------------------------------------------------------------------------------------------------------------------------------------------------------------------------------------------------------------------------------------------------------------------------------------------------------------------------------------------------------------------------------------------------------------------------------------------------------------------------------------------------------------------------------------------------------------------------------------------|
| <b>F1 Basic patient and amputation data</b> | <p><i>A new F1 has to be registered for every new surgical procedure</i></p> <ul style="list-style-type: none"> <li>• Name, gender, and the national personal identification number</li> <li>• Date of surgery, side, and level of the current amputation surgery</li> </ul>                                                                                                                                                                                                                                                                                                                                                                                                                                                                        |
| <b>F2 Amputation data</b>                   | <ul style="list-style-type: none"> <li>• Type of procedure (primary amputation, re-amputation to a more proximal level, revision within the same classified amputation level)</li> <li>• Operating hospital</li> <li>• Underlying diagnosis and immediate cause for amputation</li> <li>• Surgical flap technique, parenteral nutrition, antibiotics, and low-molecular heparin</li> <li>• Comorbidities, smoking habits, and ability to walk prior to amputation</li> </ul>                                                                                                                                                                                                                                                                        |
| <b>F3 Prosthetic supply</b>                 | <ul style="list-style-type: none"> <li>• Type of prosthesis (first prosthesis for this level, new socket, or new prosthesis)</li> <li>• Type of socket, suspension method, foot and knee component</li> <li>• Residual limb problems</li> <li>• Date of fitting of the first prosthesis for this amputation</li> </ul>                                                                                                                                                                                                                                                                                                                                                                                                                              |
| <b>F4 Baseline data</b>                     | <p><i>Baseline patient-reported data describe the patient's situation prior to the impairment leading to amputation</i></p> <ul style="list-style-type: none"> <li>• Type of accommodation (home with or without assistance or nursing home)</li> <li>• Use of walking-aids and/or wheelchair</li> <li>• The Locomotor Capability Index-5L (LCI-5L)</li> </ul>                                                                                                                                                                                                                                                                                                                                                                                      |
| <b>F5 Outcome data</b>                      | <p><i>Follow-up and patient-reported data 6, 12, and 24 months after final amputation level</i></p> <ul style="list-style-type: none"> <li>• Date of training start with the first prosthesis</li> <li>• Returned to the same accommodation as prior to amputation (yes/no)</li> <li>• Independently donning and doffing the prosthesis (yes/no)</li> <li>• Prosthetic Use Score (0–100)</li> <li>• Socket Comfort Score (0–10)</li> <li>• LCI-5L (0–56)</li> <li>• Use of walking-aids and/or wheelchair</li> <li>• Phantom limb pain and residual limb pain</li> <li>• Perception of the current general situation as an amputee (very good/good/average/bad/very bad)</li> <li>• EQ-5D-5L index</li> <li>• Timed-Up-and-Go test (TUG)</li> </ul> |
| <b>F6 Gait data</b>                         | <ul style="list-style-type: none"> <li>• Temporal gait parameters and gait symmetry</li> <li>• TUG test and 2-minute walk test</li> </ul>                                                                                                                                                                                                                                                                                                                                                                                                                                                                                                                                                                                                           |
